# Supplementary material for: Lipidomics Analysis of Multilamellar Bodies Produced by Amoeba Acanthamoeba castellanii in Co-Culture with Klebsiella aerogenes
Source: MDPI journal article supplement (doi:10.3390/pathogens12030411), 2023-03-03
Supplement: s1 [file s1]

# Lipidomics Analysis of Multilamellar Bodies Produced by *Amoeba Acanthamoeba castellanii* in Co-Culture with *Klebsiella aerogenes*

Magdalena Anna Karas<sup>1,\*</sup>, Anna Turska-Szewczuk<sup>1</sup>, Iwona Komaniecka<sup>1</sup> and Barbara Łotocka<sup>2</sup>

<sup>1</sup> Department of Genetics and Microbiology, Institute of Biological Science, Faculty of Biology and Biotechnology, Maria Curie-Skłodowska University, Akademicka 19, 20-033 Lublin, Poland

<sup>2</sup> Department of Botany, Faculty of Agriculture and Biology, Warsaw University of Life Sciences, Nowoursynowska 159, 02-776 Warsaw, Poland

\* Correspondence: magdalena.karas@mail.umcs.pl

## Supplementary Materials

### 1. The MLBs production inside *Acanthamoeba castellanii*

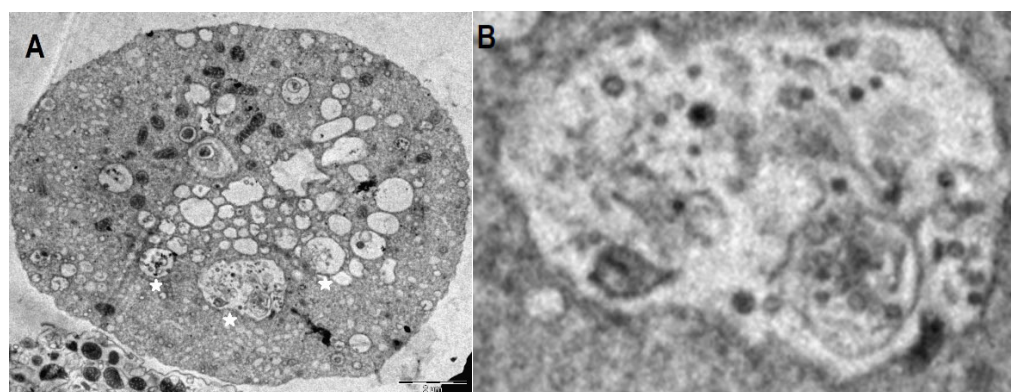

**Figure S1.** Representative TEM image of *A. castellanii* trophozoite cultured axenically for 48 hours on NNA agar plates. A. and B. magnified image of an autophagic-like vacuole; The white stars denote autophagic-like vesicles containing completely or partially digested mitochondria or cytosolic compartments.

### 2. Lipidomic analysis of MLBs derived of *Acanthamoeba castellanii*

**Table S1.** Classes and content (given in mol %) of ester bound fatty acids residues identified in lipids extracted from MLBs using the Bligh and Dyer protocol.

| Fatty acid                 | mol %               |
|----------------------------|---------------------|
| 14:0                       | 1.055 ± 0.18        |
| 15:0                       | tr                  |
| 16:1 <sup>Δ7</sup>         | 1.87 ± 0.72         |
| <b>16:0</b>                | <b>21.43 ± 3.7</b>  |
| 17:1*                      | 3.25 ± 0.7          |
| 17:0                       | tr                  |
| 18:3*                      | tr                  |
| 18:2 <sup>Δ9,12</sup>      | 1.36 ± 0.47         |
| <b>18:1<sup>Δ9</sup></b>   | <b>38.46 ± 0.87</b> |
| 18:1*                      | 4.4 ± 1.8           |
| <b>18:0</b>                | <b>20.75 ± 2.08</b> |
| 20:4 <sup>Δ5,8,11,14</sup> | 2.41 ± 0.56         |
| 20:3 <sup>Δ8,11,14</sup>   | 1.15 ± 0.11         |

|                        |            |
|------------------------|------------|
| 20:2 <sup>Δ11,14</sup> | 1.4 ± 0.07 |
| 20:0                   | tr         |

Data were determined by GC-MS analysis of the FAs methyl esters subsequent to saponification (0.8 M NaOH/50 % MeOH; 1 h/ 80°C). The results are presented as ± S.D. of three independent measurements. \*

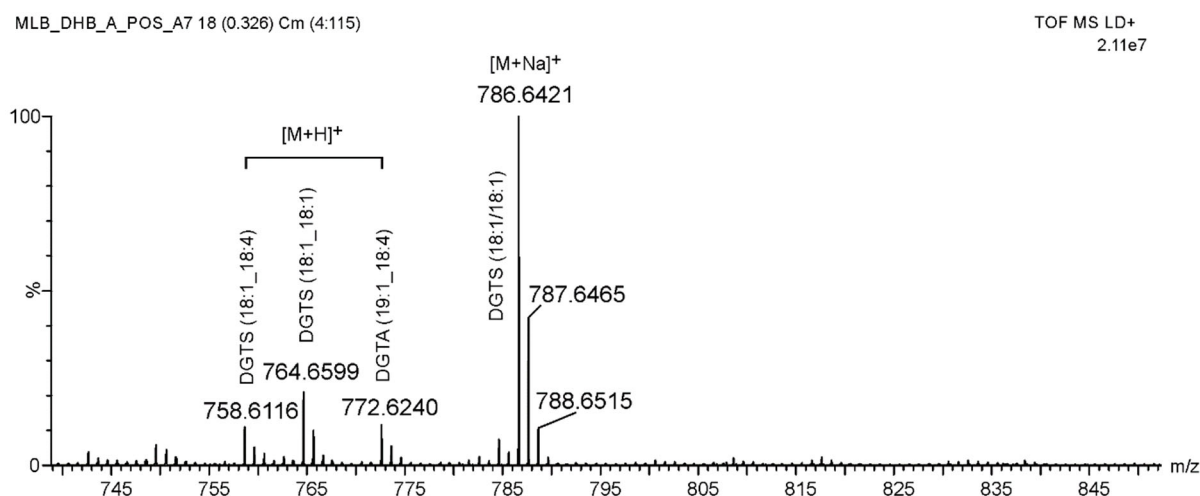

**Figure S2.** Spectrometric analysis of betaine lipids from MLBs of *A. castellanii*. Ions registered as  $[M + H]^+$  and  $[M + Na]^+$  adducts by MALDI-TOF in  $m/z$  range 700 - 850.

### 3. Lipids derived of whole cells *Klebsiella aerogenes*

#### 3.1. HPTLC analysis

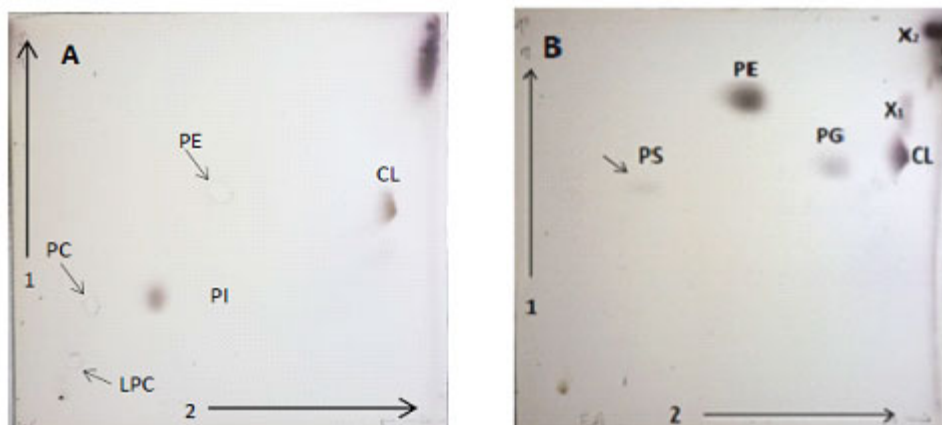

**Figure S3.** 2-D HPTLC chromatograms of **A)** commercial standards **B)** phospholipids extracted from whole cells of *Klebsiella aerogenes*. Abbreviations: PC - phosphatidylcholine, PE - phosphatidylethanolamine, CL - cardiolipin, PS - phosphatidylserine, LPC - lysophosphatidylcholine, PI - phosphatidylinositol; Used solvents: 1 – first direction - chloroform/methanol/water (14:6:1, v/v/v), 2- second direction chloroform/methanol/acetic acid (13:5:2) [15].

#### 3.2. Fatty acids identified in total lipids of *K. aerogenes*

Among fatty acids liberated by saponification (conditions as for data in Table 1S) from total lipids of *K. aerogenes* and derivatized to methyl esters identified by GC-MS: C16:0 (41.97 ± 0.6 mol%), *cyc*17:0 (29.53 ± 0.19 mol%), and *cyc*19:0 (14.92 ± 1.31 mol%), C18:1<sup>49</sup> (5.14 ± 0.09 mol%), C14:0 (3.9 ± 0.55 mol%). In trace amount ( < 2.0 %) also registered: C15:0, C16:1, C17:0, C18:0. The results are presented as ± S.D. of three independent measurements.

### 3.3. DI-ESI-MS and MALDI-TOF MS<sup>2</sup> analysis of lipids *K. aerogenes*

**Table S2.** Lipids identified in whole cells *K. pneumoniae* by DI-ESI-MS. For some molecular species fatty acids were established by MALDI-TOF MS<sup>2</sup> fragmentation. Abbreviations for PLs are given in Figure 3S. *c* - cyclopropane ring structure.

| Lipid<br>(acyl carbons:<br>double bonds)                 | Adduct                | Formula                                             | Observed <i>m/z</i> | Calculated <i>m/z</i> |
|----------------------------------------------------------|-----------------------|-----------------------------------------------------|---------------------|-----------------------|
| <b>PE (30:0)</b>                                         | [M + H] <sup>+</sup>  | C <sub>35</sub> H <sub>71</sub> NO <sub>8</sub> P   | 664.4926            | 664.4917              |
|                                                          | [M + Na] <sup>+</sup> | C <sub>35</sub> H <sub>70</sub> NO <sub>8</sub> PNa | 686.4781            | 686.4737              |
|                                                          | [M - H] <sup>-</sup>  | C <sub>35</sub> H <sub>69</sub> NO <sub>8</sub> P   | 662.4811            | 662.4761              |
| <b>PE (31:1)</b>                                         | [M + H] <sup>+</sup>  | C <sub>36</sub> H <sub>71</sub> NO <sub>8</sub> P   | 676.4960            | 676.4917              |
|                                                          | [M + Na] <sup>+</sup> | C <sub>35</sub> H <sub>70</sub> NO <sub>8</sub> PNa | 698.4815            | 698.4737              |
|                                                          | [M - H] <sup>-</sup>  | C <sub>36</sub> H <sub>69</sub> NO <sub>8</sub> P   | 674.4771            | 674.4761              |
| <b>PE (32:1)</b>                                         | [M + H] <sup>+</sup>  | C <sub>37</sub> H <sub>73</sub> NO <sub>8</sub> P   | 690.5097            | 690.5074              |
|                                                          | [M + Na] <sup>+</sup> | C <sub>37</sub> H <sub>72</sub> NO <sub>8</sub> PNa | 712.4986            | 712.4893              |
|                                                          | [M - H] <sup>-</sup>  | C <sub>37</sub> H <sub>71</sub> NO <sub>8</sub> P   | 688.4937            | 688.4917              |
| <b>PE (32:0)</b>                                         | [M + H] <sup>+</sup>  | C <sub>37</sub> H <sub>75</sub> NO <sub>8</sub> P   | 692.5300            | 692.5230              |
|                                                          | [M + Na] <sup>+</sup> | C <sub>37</sub> H <sub>74</sub> NO <sub>8</sub> PNa | 714.5040            | 714.5050              |
|                                                          | [M - H] <sup>-</sup>  | C <sub>37</sub> H <sub>73</sub> NO <sub>8</sub> P   | 690.5127            | 690.5074              |
| <b>PE (16:0/<i>c</i>17:0)</b>                            | [M + H] <sup>+</sup>  | C <sub>38</sub> H <sub>75</sub> NO <sub>8</sub> P   | 704.5281            | 704.5230              |
|                                                          | [M + Na] <sup>+</sup> | C <sub>38</sub> H <sub>74</sub> NO <sub>8</sub> PNa | 726.5137            | 726.5050              |
|                                                          | [M - H] <sup>-</sup>  | C <sub>38</sub> H <sub>73</sub> NO <sub>8</sub> P   | 702.5155            | 702.5074              |
| <b>PE (34:1)</b>                                         | [M + H] <sup>+</sup>  | C <sub>39</sub> H <sub>77</sub> NO <sub>8</sub> P   | 718.5469            | 718.5387              |
|                                                          | [M + Na] <sup>+</sup> | C <sub>39</sub> H <sub>76</sub> NO <sub>8</sub> PNa | 740.5228            | 740.5206              |
|                                                          | [M - H] <sup>-</sup>  | C <sub>39</sub> H <sub>75</sub> NO <sub>8</sub> P   | 716.5226            | 716.5230              |
| <b>PE (35:1)</b>                                         | [M + H] <sup>+</sup>  | C <sub>40</sub> H <sub>79</sub> NO <sub>8</sub> P   | 732.5620            | 732.5543              |
|                                                          | [M + Na] <sup>+</sup> | C <sub>40</sub> H <sub>78</sub> NO <sub>8</sub> PNa | 754.5458            | 754.5363              |
|                                                          | [M - H] <sup>-</sup>  | C <sub>40</sub> H <sub>77</sub> NO <sub>8</sub> P   | 730.5462            | 730.5387              |
| <b>PE (<i>c</i>17:0_<i>c</i>19:0)</b>                    | [M + H] <sup>+</sup>  | C <sub>41</sub> H <sub>79</sub> NO <sub>8</sub> P   | 744.5551            | 744.5538              |
|                                                          | [M + Na] <sup>+</sup> | C <sub>41</sub> H <sub>78</sub> NO <sub>8</sub> PNa | 766.5355            | 766.5397              |
| <b>PG (<i>c</i>17:0_16:0)<br/>PG (<i>c</i>19:0_14:0)</b> | [M - H] <sup>-</sup>  | C <sub>39</sub> H <sub>77</sub> NO <sub>10</sub> P  | 733.5012            | 733.5020              |
| <b>PG (35:1)</b>                                         | [M - H] <sup>-</sup>  | C <sub>41</sub> H <sub>78</sub> NO <sub>10</sub> P  | 788.5470            | 788.5442              |
| <b>PS (36:1)</b>                                         | [M - H] <sup>-</sup>  | C <sub>42</sub> H <sub>79</sub> NO <sub>10</sub> P  | 788.5470            | 788.5442              |

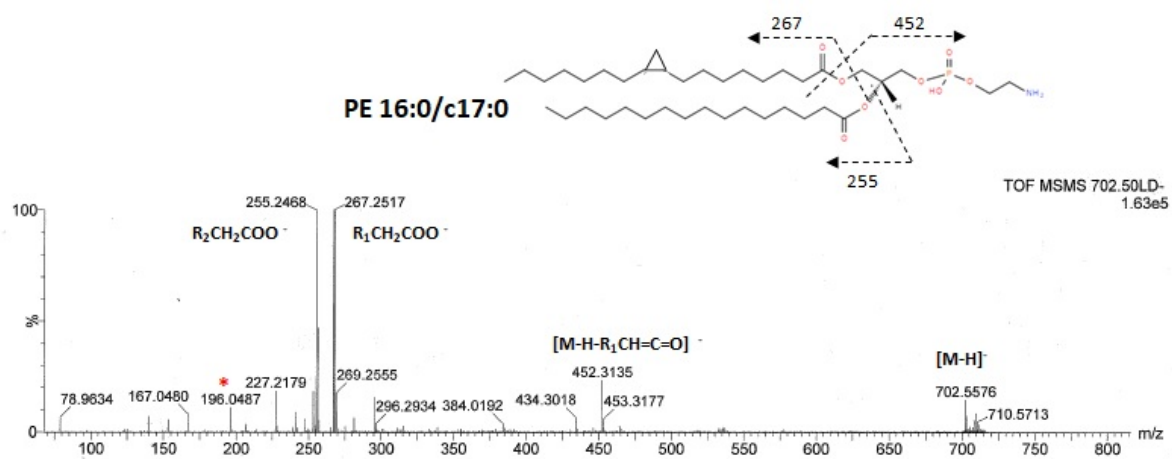

**Figure S4.** The MS<sup>2</sup> mass spectrum and fragmentation pattern for a selected ion corresponding to phospholipid PE (16:0/c17:0)  $[M - H]^-$  obtained from total lipid extract from whole cells of *K. aerogenes*.
